# Supplementary material
Source: publisher figshare collection journal article supplement (https://tandf.figshare.com/articles/dataset/_/825934)

Figure S1. Superimposed surface representation of Sunitinib docking mode with different conformers which were generated during MD simulation of wildtype and mutant KIT. a) at 0 ns b) At 35.5 ns c) 70.5 ns and d) at 100 ns. The symbol coding scheme is as follows: wildtype (green) and mutant ( red). EAL region represented as cartoon model and Sunitinib as stick model.

a)

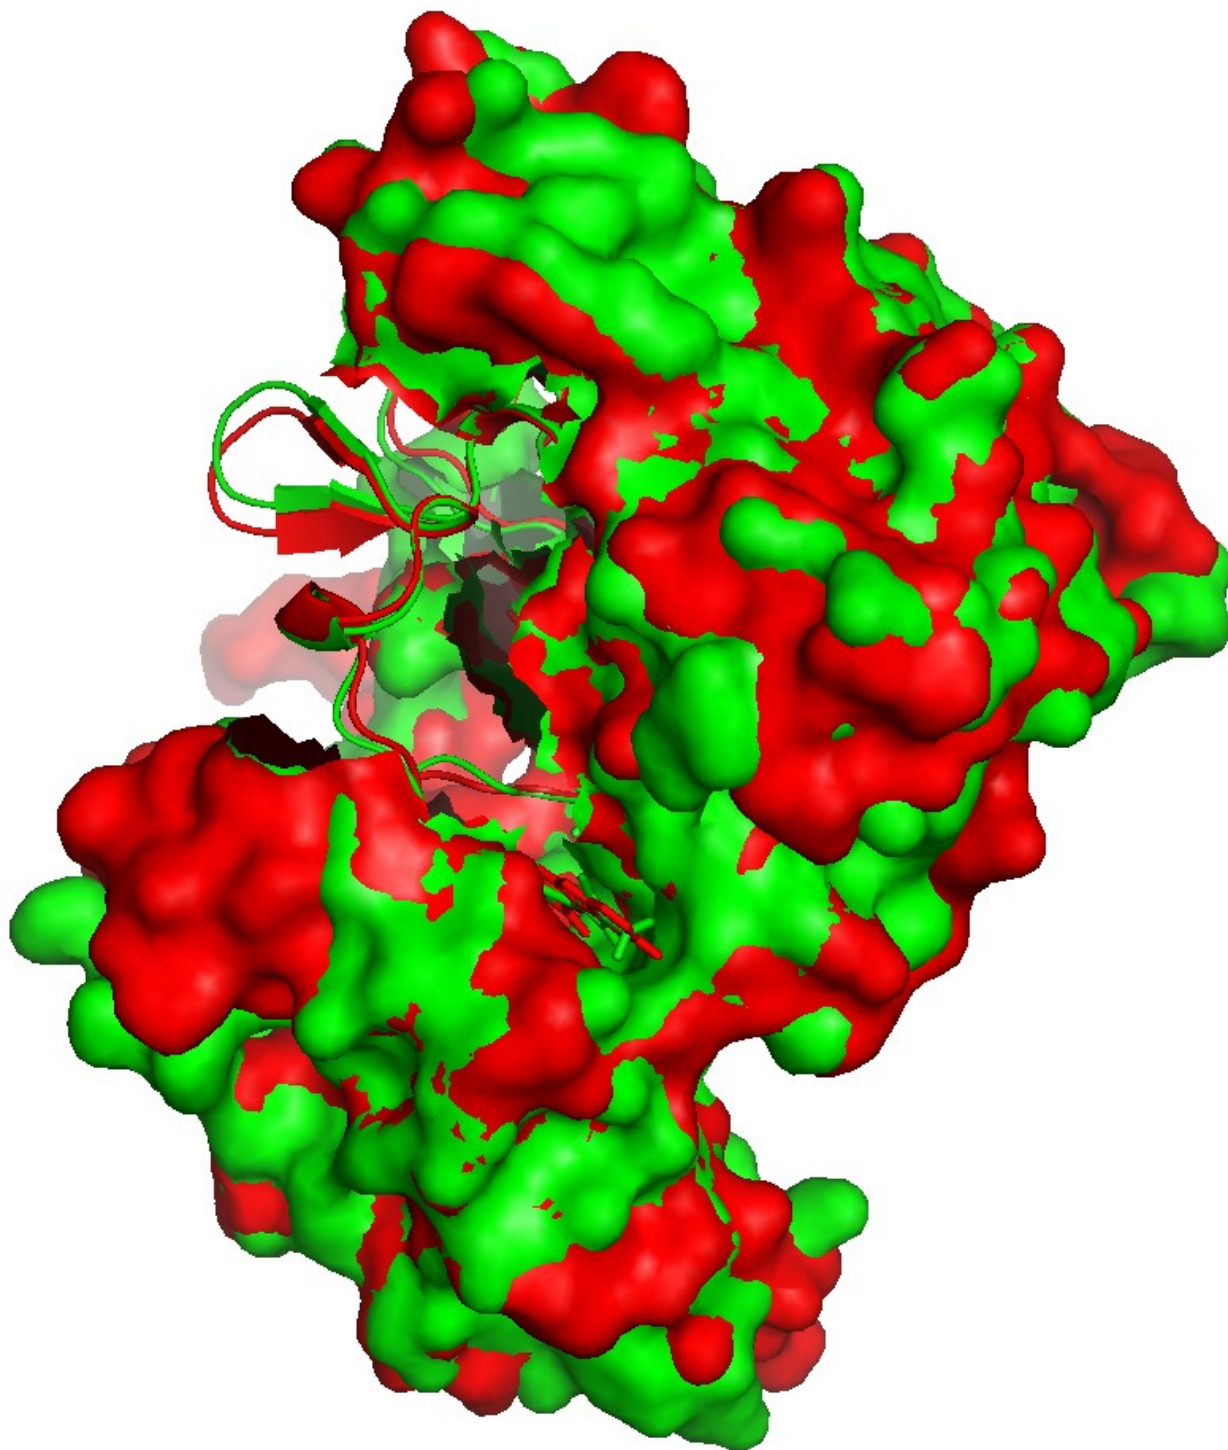

b)

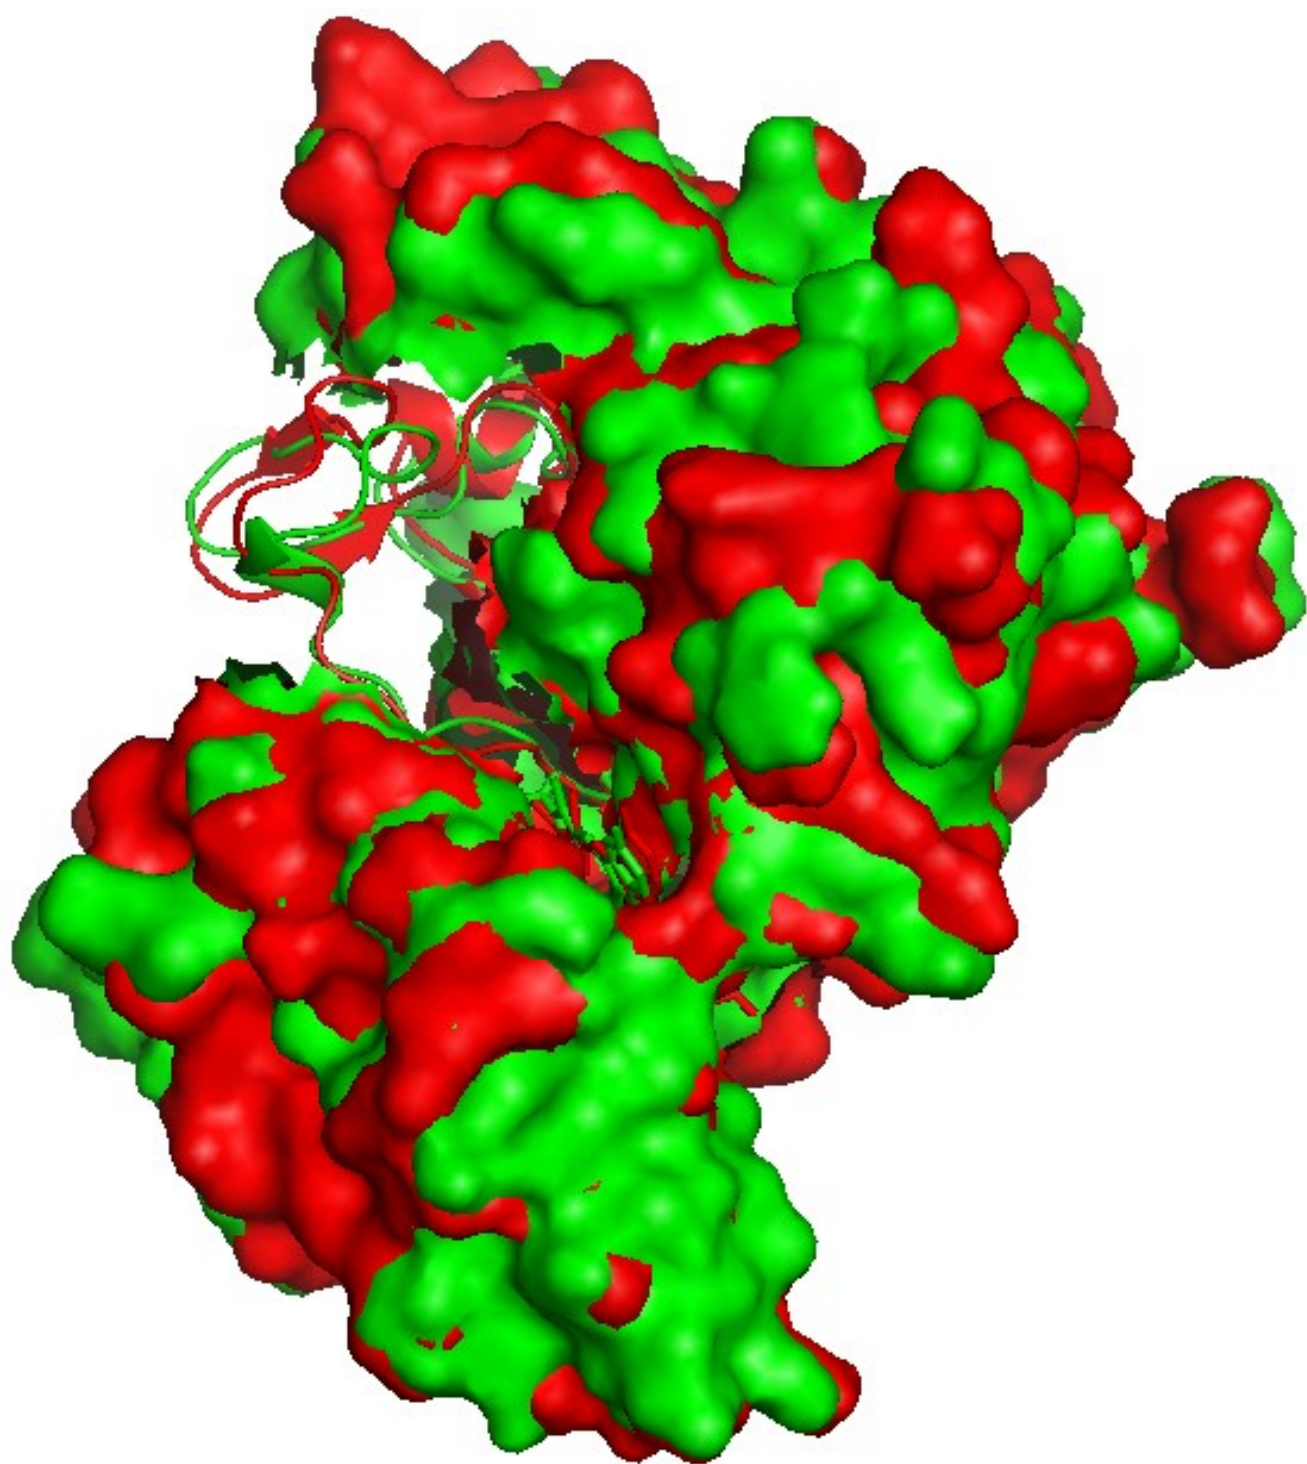

c)

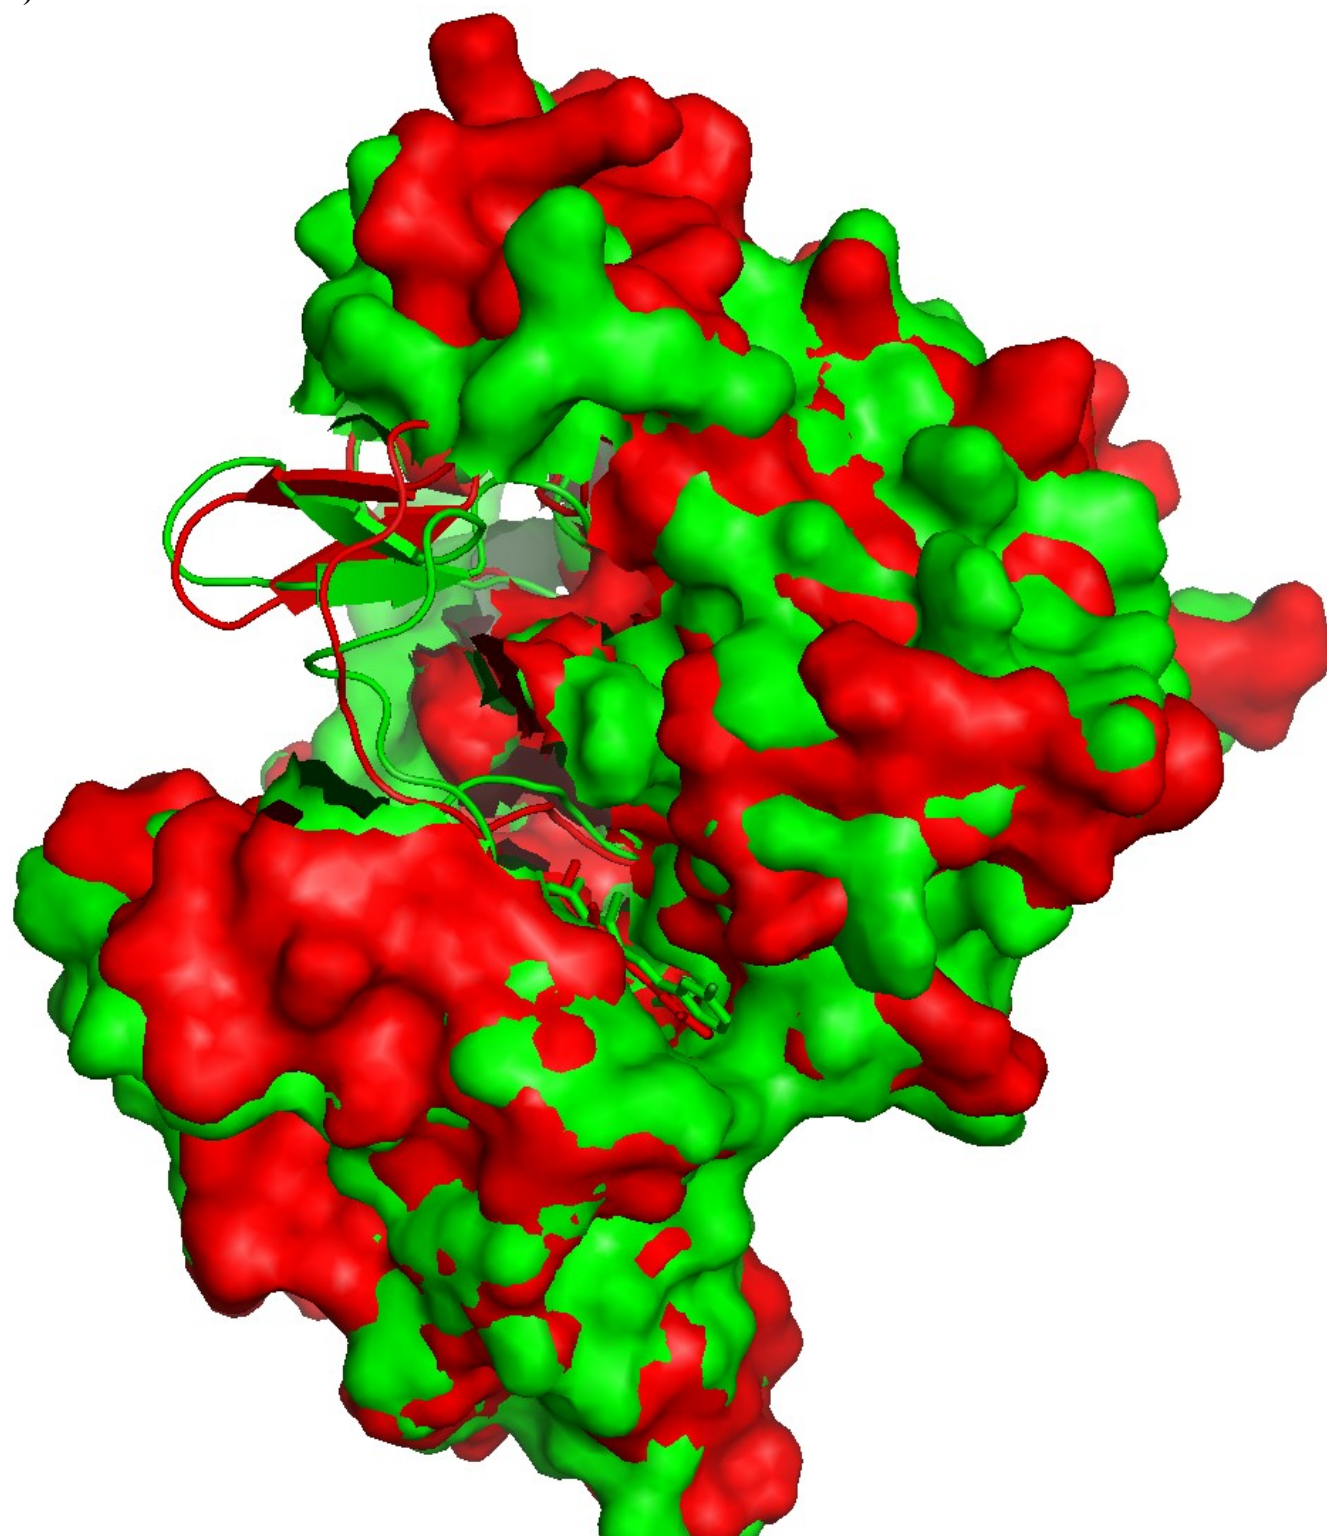



d)

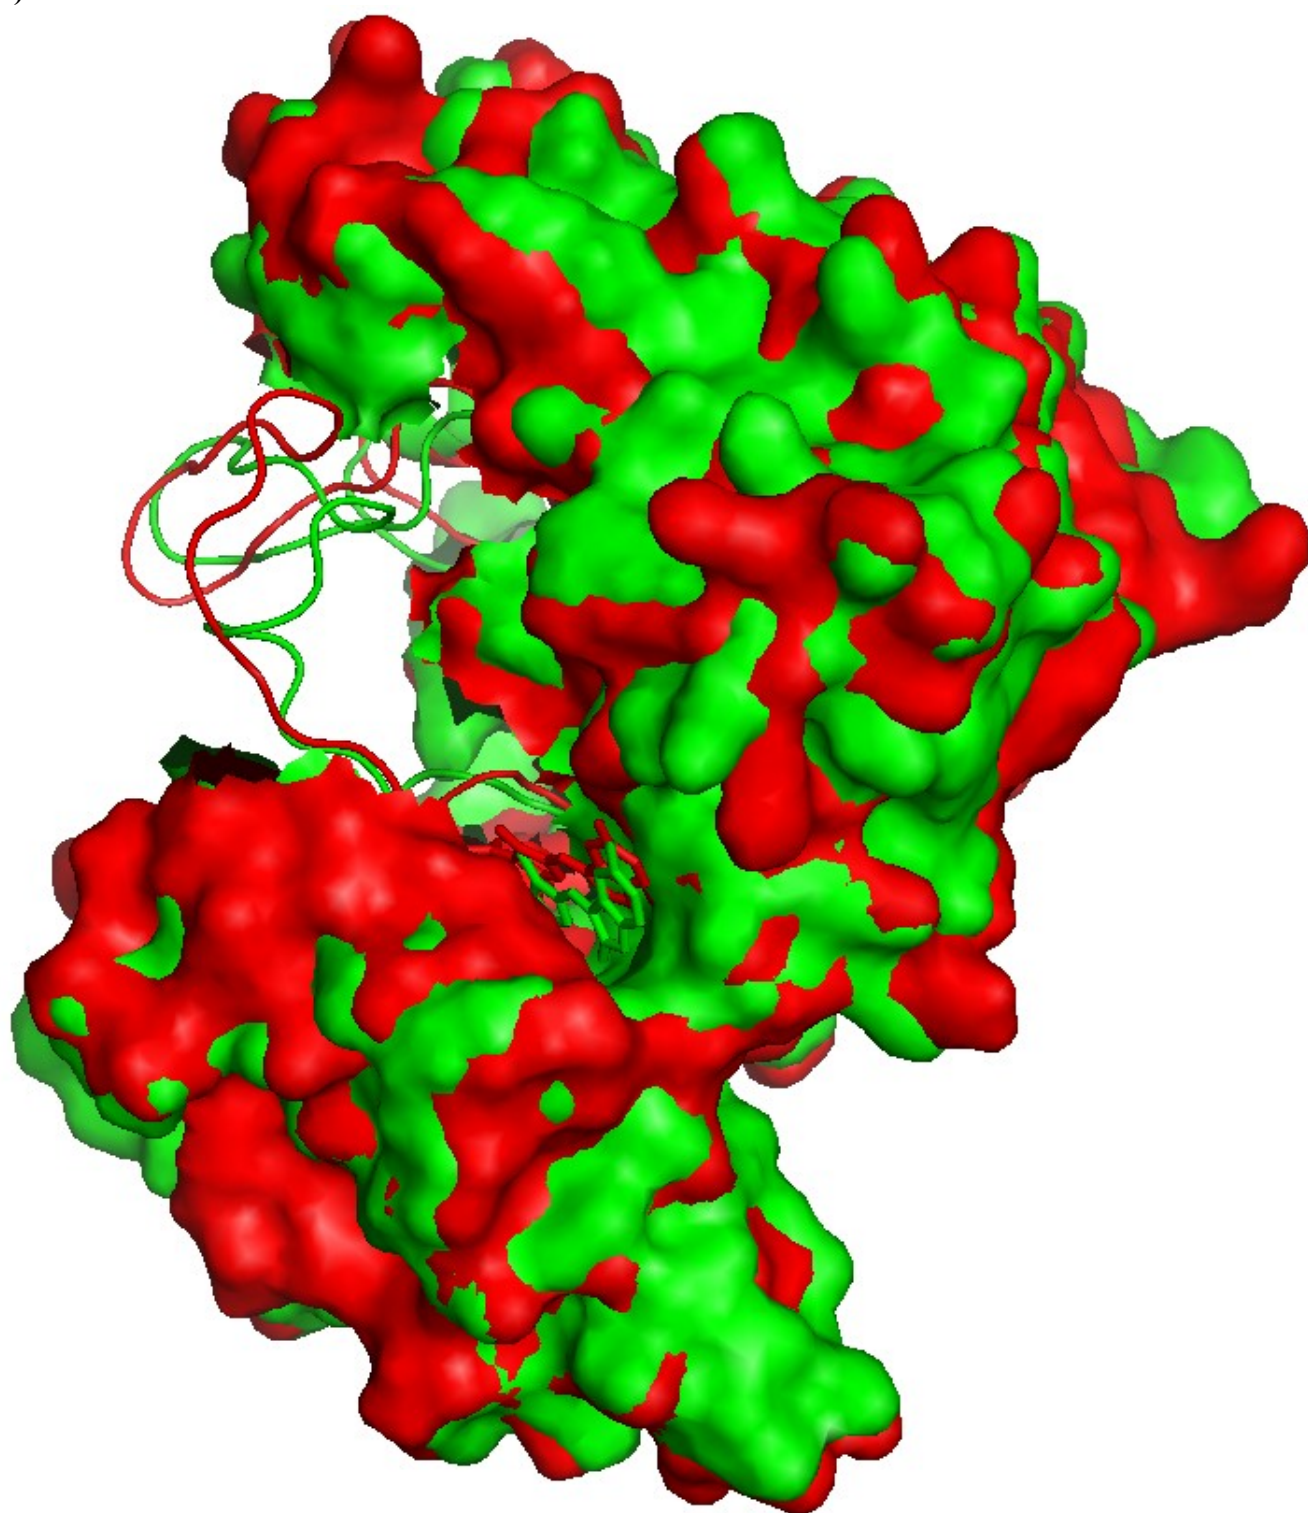

Supplement: Supplementary file 1 [file 2]
